# Supplementary material for: Aza-bicyclodiene based photoswitches for molecular solar thermal energy storage
Source: Royal Society of Chemistry journal article supplement (doi:10.1039/d3ya00455d), 2023-11-28
Supplement: d3ya00455d1.pdf [file d3ya00455d1.pdf]

## Electronic Supporting Information (ESI)

### **Aza-bicyclodiene based photoswitches for molecular solar thermal energy storage**

Akanksha Ashok Sangolkar, Rama Krishna Kadiyam, and Ravinder Pawar\*

*Laboratory of Advanced Computation and Theory for Materials and Chemistry, Department of Chemistry,*

*National Institute of Technology Warangal (NITW), Warangal, Telangana-506004, India.*

[ravinder\\_pawar@nitw.ac.in](mailto:ravinder_pawar@nitw.ac.in)

#### **S1: Ring strain energy (SE) and thermochemical properties of parent bridgehead modified bicyclodiene-based photoswitching systems.**

**Table S1.** Ring strain energy (SE) and thermochemical properties of unsubstituted bridgehead modified bicyclodiene-based photoswitching systems.

| Photoswitching system | Ring strain energy (kcal/mol) |             | Thermochemical properties (kJ/mol) |        |
|-----------------------|-------------------------------|-------------|------------------------------------|--------|
|                       | Bicyclodiene                  | Photoisomer | Storage energy                     | TBR    |
| NBD/QC                | 28.95                         | 89.75       | 96.06                              | 121.76 |
| BOD/TCO               | 11.16                         | 95.08       | 186.19                             | 75.45  |
| BND/TCN               | 9.52                          | 100.55      | 222.00                             | 64.18  |
| BDD/TCD               | 4.28                          | 115.19      | 304.39                             | 37.63  |

#### **S2: Thermochemical properties**

The storage energy and energy storage density are calculated by using the electronic energy computed at DLPNO-CCSD(T)/Def2TZVP and including the thermal correction of M062X/6-311++G\*\* level. The transition state (TS) geometries are obtained *via* climbing image nudged elastic band (CI-NEB) calculations using GGA-PBE functional. The thermal back reaction barrier is estimated by computing the electronic energy of the TS and product with (8,8)-CASPT2/6-311++G\*\* level of theory.

**Table S2:** The storage energy of parent and N-substituted NBD/QC systems.

| System | Storage Energy (kJ/mol) | Storage density | Back reaction Barrier (kJ/mol) |
|--------|-------------------------|-----------------|--------------------------------|
| Ia     | 96.06                   | 1.04            | 121.76                         |
| IIa    | 56.47                   | 0.61            | 144.93                         |
| IIIa   | 139.77                  | 1.50            | 111.24                         |
| IVa    | 96.02                   | 1.02            | 148.33                         |
| Va     | 13.48                   | 0.14            | 175.38                         |

**Table S3:** The storage energy of parent and N-substituted BND/TCN systems.

| <b>System</b> | <b>Storage Energy (kJ/mol)</b> | <b>Storage density</b> | <b>Back reaction Barrier (kJ/mol)</b> |
|---------------|--------------------------------|------------------------|---------------------------------------|
| Ia            | 222.00                         | 1.85                   | 64.18                                 |
| Ila           | 210.76                         | 1.74                   | 72.64                                 |
| Illa          | 267.62                         | 2.21                   | 53.74                                 |
| IVa           | 248.51                         | 2.04                   | 68.15                                 |
| Va            | 196.29                         | 1.61                   | 75.26                                 |

**Table S4:** The storage energy of parent and N-substituted ABND/ATCN systems.

| <b>System</b> | <b>Storage Energy (kJ/mol)</b> | <b>Storage density</b> | <b>Back reaction Barrier (kJ/mol)</b> |
|---------------|--------------------------------|------------------------|---------------------------------------|
| Ia            | 220.32                         | 1.82                   | 56.55                                 |
| Ila           | 207.42                         | 1.70                   | 66.21                                 |
| Illa          | 265.60                         | 2.18                   | 52.34                                 |
| IVa           | 244.78                         | 1.99                   | 69.51                                 |
| Va            | 191.19                         | 1.55                   | 76.90                                 |

**Table S5:** The storage energy of parent and N-substituted OBND/OTCN systems.

| <b>System</b> | <b>Storage Energy (kJ/mol)</b> | <b>Storage density</b> | <b>Back reaction Barrier (kJ/mol)</b> |
|---------------|--------------------------------|------------------------|---------------------------------------|
| Ia            | 213.25                         | 1.75                   | 71.83                                 |
| Ila           | 201.42                         | 1.64                   | 84.02                                 |
| Illa          | 259.23                         | 2.11                   | 47.99                                 |
| IVa           | 237.66                         | 1.92                   | 74.24                                 |
| Va            | 183.37                         | 1.48                   | 71.98                                 |

**Table S6:** The storage energy of parent and N-substituted BDD/TCD systems.

| <b>System</b> | <b>Storage Energy (kJ/mol)</b> | <b>Storage density</b> | <b>Back reaction Barrier (kJ/mol)</b> |
|---------------|--------------------------------|------------------------|---------------------------------------|
| Ia            | 304.39                         | 2.27                   | 37.63                                 |
| Ila           | 308.61                         | 2.28                   | 53.91                                 |
| Illa          | 345.65                         | 2.56                   | -2.75                                 |
| IVa           | 346.33                         | 2.54                   | 45.82                                 |
| Va            | 299.63                         | 2.20                   | 66.52                                 |

**Table S7:** The storage energy of parent and N-substituted ABDD/ATCD systems.

| System | Storage Energy (kJ/mol) | Storage density | Back reaction Barrier (kJ/mol) |
|--------|-------------------------|-----------------|--------------------------------|
| Ia     | 299.99                  | 2.22            | 38.27                          |
| IIa    | 301.08                  | 2.21            | 59.32                          |
| IIb    | 304.61                  | 2.24            | 47.06                          |
| IIIa   | 345.30                  | 2.54            | -2.04                          |
| IIIb   | 345.33                  | 2.54            | 39.45                          |
| IVa    | 340.58                  | 2.48            | 51.15                          |
| IVb    | 346.66                  | 2.53            | 51.36                          |
| Va     | 292.52                  | 2.13            | 56.56                          |

**Table S8:** The storage energy of parent and N-substituted OBDD/OTCD systems.

| System | Storage Energy (kJ/mol) | Storage density | Back reaction Barrier (kJ/mol) |
|--------|-------------------------|-----------------|--------------------------------|
| Ia     | 290.76                  | 2.14            | 50.06                          |
| IIa    | 290.53                  | 2.12            | 61.33                          |
| IIb    | 294.06                  | 2.15            | 58.83                          |
| IIIa   | 342.35                  | 2.50            | 42.95                          |
| IIIb   | 335.61                  | 2.45            | 51.89                          |
| IVa    | 331.41                  | 2.40            | 56.08                          |
| IVb    | 334.96                  | 2.43            | 60.83                          |
| Va     | 280.37                  | 2.03            | 60.49                          |

### S3: Photophysical properties

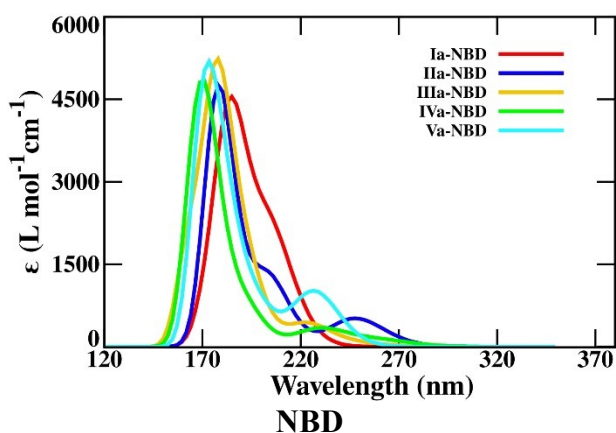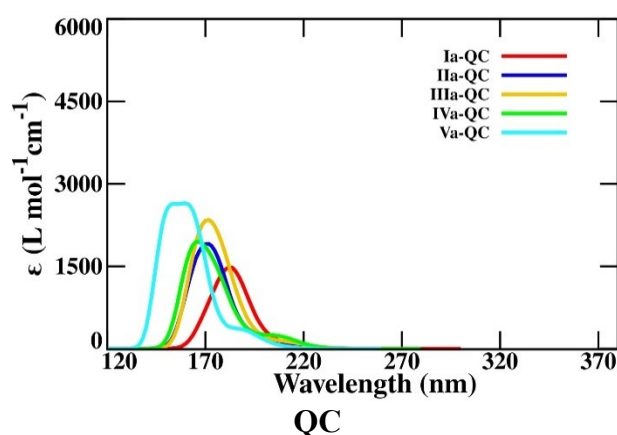

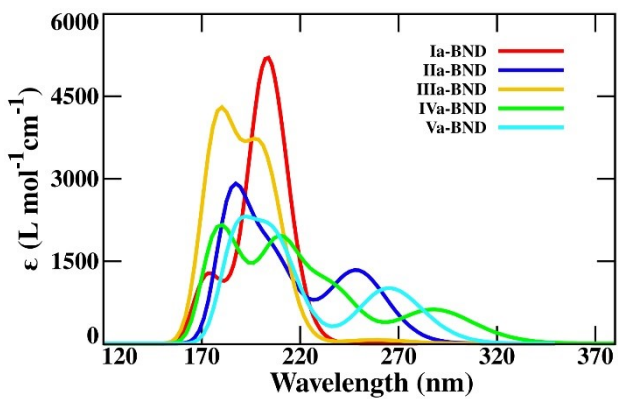

**BND**

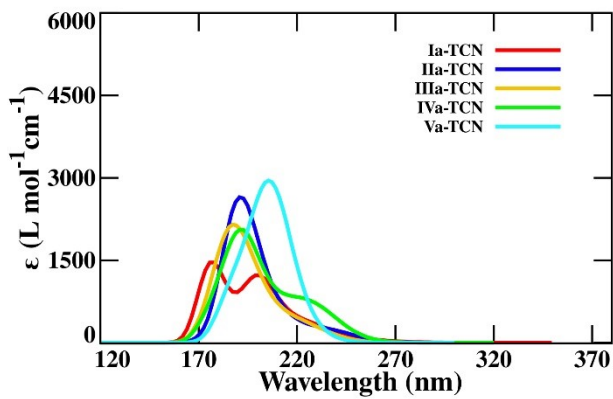

**TCN**

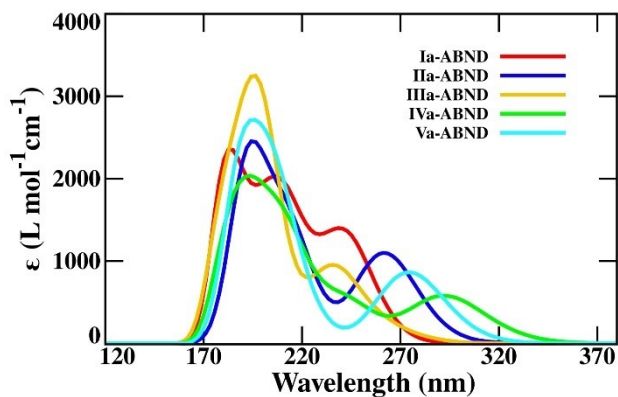

**ABND**

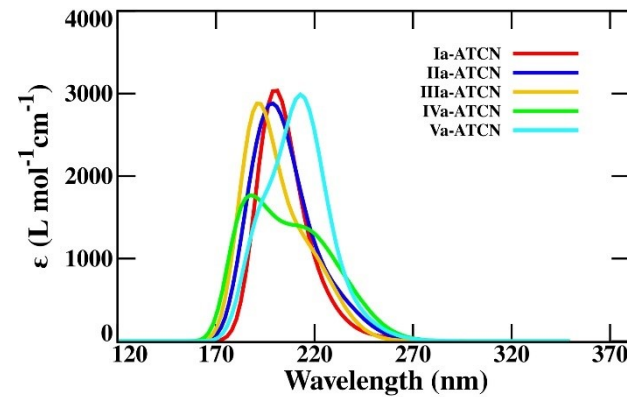

**ATCN**

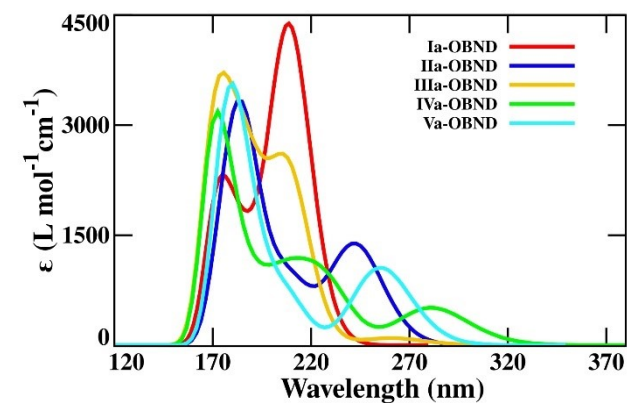

**OBND**

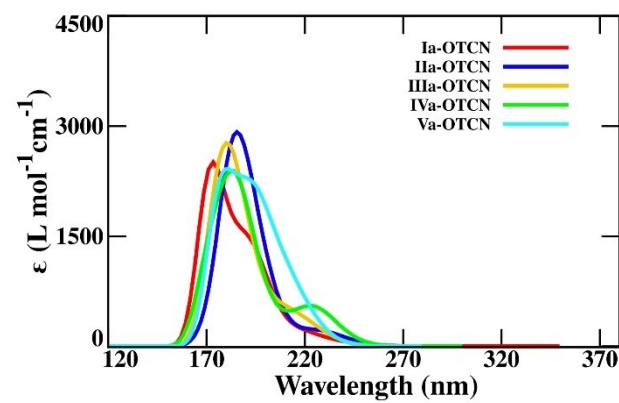

**OTCN**

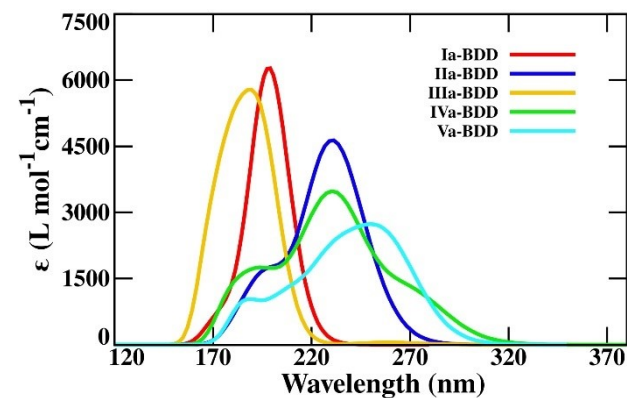

**BDD**

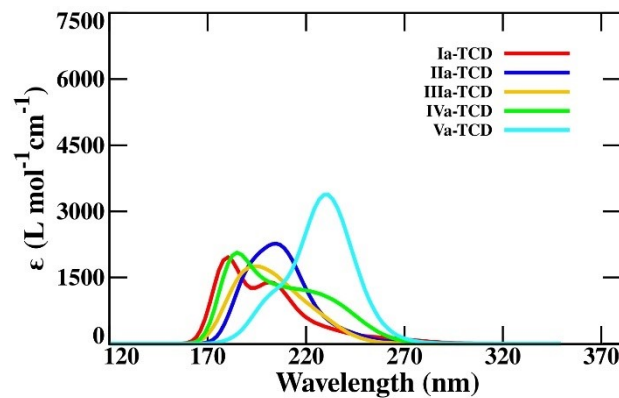

**TCD**

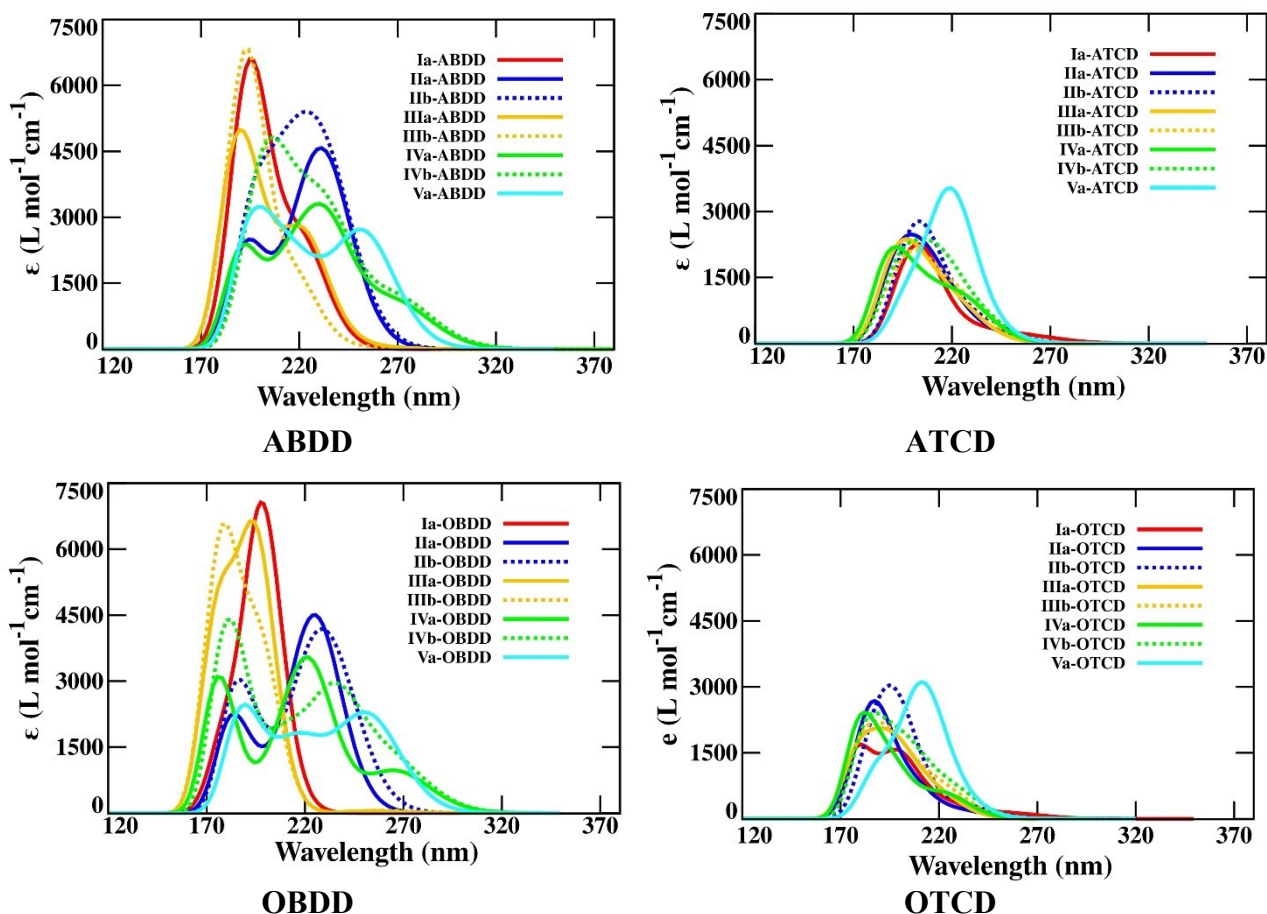

**Figure S1.** Optical absorption spectra of parent and N-substituted photoswitching systems.

**Table S9:** The first important excitation wavelength with the oscillatory strength surpassing 0.01 for the NBD/QC system calculated using M062X/6-311++G\*\* level.

| System      | Absorption wavelength (nm) | Oscillatory strength | Absorption wavelength (nm) | Oscillatory strength |
|-------------|----------------------------|----------------------|----------------------------|----------------------|
|             | <b>Reactant</b>            |                      | <b>Product</b>             |                      |
| <b>Ia</b>   | 214.42                     | 0.0124               | 184.63                     | 0.0149               |
| <b>IIa</b>  | 247.90                     | 0.0126               | 175.95                     | 0.0126               |
| <b>IIIa</b> | 223.06                     | 0.0104               | 171.19                     | 0.0117               |
| <b>IVa</b>  | 194.02                     | 0.0126               | 177.11                     | 0.0152               |
| <b>Va</b>   | 227.04                     | 0.0247               | 170.26                     | 0.0108               |

**Table S10:** The first important excitation wavelength with the oscillatory strength surpassing 0.01 for the BND/TCN system calculated using M062X/6-311++G\*\* level.

| System | Absorption | Oscillatory | Absorption | Oscillatory |
|--------|------------|-------------|------------|-------------|
|        | wavelength |             | wavelength |             |
|        | (nm)       | strength    | (nm)       | strength    |
|        | Reactant   |             | Product    |             |
| Ia     | 206.69     | 0.0129      | 199.61     | 0.0190      |
| IIa    | 249.45     | 0.0318      | 193.74     | 0.0202      |
| IIIa   | 203.13     | 0.0593      | 196.60     | 0.0153      |
| IVa    | 288.02     | 0.0153      | 229.64     | 0.0108      |
| Va     | 265.36     | 0.0249      | 207.15     | 0.0606      |

**Table S11:** The first important excitation wavelength with the oscillatory strength surpassing 0.01 for the ABND/ATCN system calculated using M062X/6-311++G\*\* level.

| System | Absorption | Oscillatory | Absorption | Oscillatory |
|--------|------------|-------------|------------|-------------|
|        | wavelength |             | wavelength |             |
|        | (nm)       | strength    | (nm)       | strength    |
|        | Reactant   |             | Product    |             |
| Ia     | 242.09     | 0.0319      | 207.27     | 0.0141      |
| IIa    | 261.94     | 0.0270      | 207.67     | 0.0157      |
| IIIa   | 236.38     | 0.0209      | 223.11     | 0.0105      |
| IVa    | 292.50     | 0.0142      | 219.79     | 0.0173      |
| Va     | 274.38     | 0.0213      | 214.48     | 0.0612      |

**Table S12:** The first important excitation wavelength with the oscillatory strength surpassing 0.01 for the OBND/OTCN system calculated using M062X/6-311++G\*\* level.

| System | Absorption | Oscillatory | Absorption | Oscillatory |
|--------|------------|-------------|------------|-------------|
|        | wavelength |             | wavelength |             |
|        | (nm)       | strength    | (nm)       | strength    |
|        | Reactant   |             | Product    |             |
| Ia     | 213.22     | 0.0159      | 193.35     | 0.0162      |
| IIa    | 242.44     | 0.0338      | 195.95     | 0.0166      |
| IIIa   | 209.51     | 0.0525      | 190.24     | 0.0127      |
| IVa    | 281.01     | 0.0126      | 186.95     | 0.0226      |
| Va     | 255.32     | 0.0261      | 207.19     | 0.0150      |

**Table S13:** The first important excitation wavelength with the oscillatory strength surpassing 0.01 for the BDD/TCD system calculated using M062X/6-311++G\*\* level.

| System | Absorption wavelength (nm) | Oscillatory strength | Absorption wavelength (nm) | Oscillatory strength |
|--------|----------------------------|----------------------|----------------------------|----------------------|
|        | Reactant                   |                      | Product                    |                      |
| Ia     | 207.52                     | 0.0165               | 202.19                     | 0.0262               |
| IIa    | 245.40                     | 0.0211               | 207.74                     | 0.0257               |
| IIIa   | 196.41                     | 0.0432               | 224.34                     | 0.0101               |
| IVa    | 271.66                     | 0.0265               | 235.68                     | 0.0115               |
| Va     | 259.15                     | 0.0491               | 230.68                     | 0.0761               |

**Table S14:** The first important excitation wavelength with the oscillatory strength surpassing 0.01 for the ABDD/ATCD system calculated using M062X/6-311++G\*\* level.

| System | Absorption wavelength (nm) | Oscillatory strength | Absorption wavelength (nm) | Oscillatory strength |
|--------|----------------------------|----------------------|----------------------------|----------------------|
|        | Reactant                   |                      | Product                    |                      |
| Ia     | 223.66                     | 0.0478               | 208.76                     | 0.0102               |
| IIa    | 239.74                     | 0.0282               | 205.74                     | 0.0108               |
| IIb    | 243.22                     | 0.0255               | 207.57                     | 0.0302               |
| IIIa   | 226.46                     | 0.0202               | 212.69                     | 0.0154               |
| IIIb   | 218.97                     | 0.0357               | 229.11                     | 0.0121               |
| IVa    | 270.45                     | 0.0242               | 230.41                     | 0.0107               |
| IVb    | 271.44                     | 0.0262               | 218.78                     | 0.0158               |
| Va     | 254.32                     | 0.0561               | 222.32                     | 0.0173               |

**Table S15:** The first important excitation wavelength with the oscillatory strength surpassing 0.01 for the OBDD/OTCD system calculated using M062X/6-311++G\*\* level.

| System | Absorption wavelength (nm) | Oscillatory strength | Absorption wavelength (nm) | Oscillatory strength |
|--------|----------------------------|----------------------|----------------------------|----------------------|
|        | Reactant                   |                      | Product                    |                      |
| Ia     | 204.14                     | 0.0248               | 198.98                     | 0.0216               |
| IIa    | 229.24                     | 0.0552               | 191.76                     | 0.0130               |
| IIb    | 239.71                     | 0.0391               | 200.92                     | 0.0245               |
| IIIa   | 199.16                     | 0.0218               | 201.57                     | 0.0154               |
| IIIb   | 198.82                     | 0.0688               | 200.17                     | 0.0209               |
| IVa    | 266.41                     | 0.0233               | 198.68                     | 0.0109               |
| IVb    | 266.75                     | 0.0251               | 228.66                     | 0.0124               |
| Va     | 254.89                     | 0.0452               | 227.70                     | 0.0105               |
